# Supplementary material for: Causal association between inflammatory bowel disease and 32 site-specific extracolonic cancers: a Mendelian randomization study
Source: Springer Nature journal article supplement (doi:10.1186/s12916-023-03096-y), 2023-10-10

### Inflammatory bowel disease (UKB)

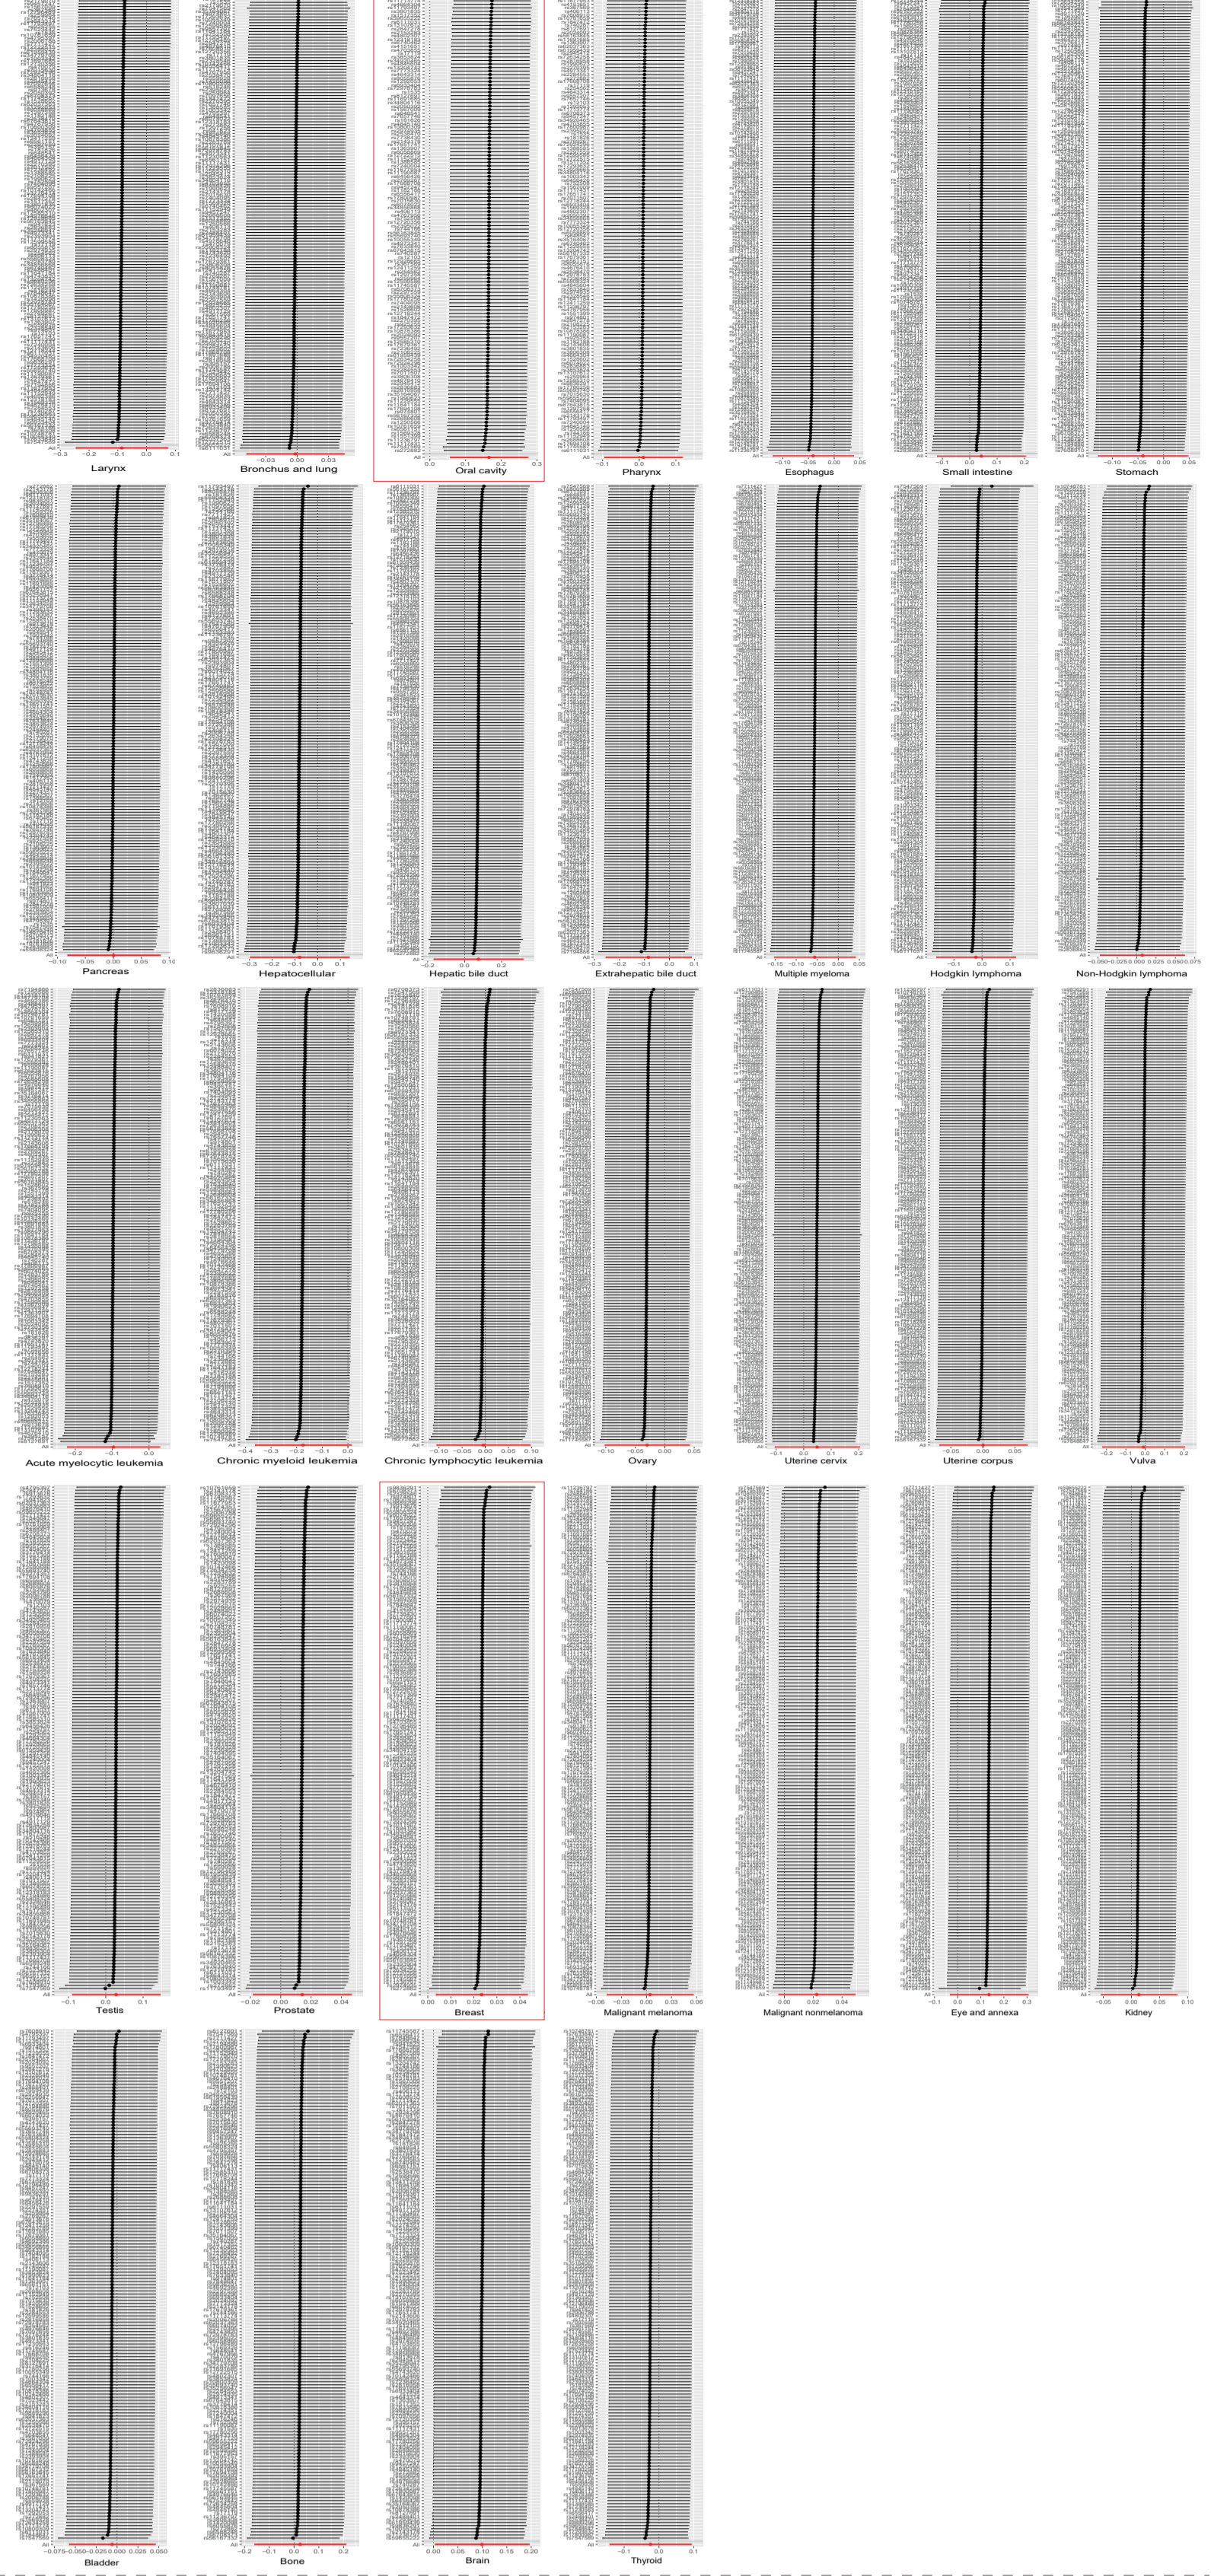

### Crohn's disease (UKB)

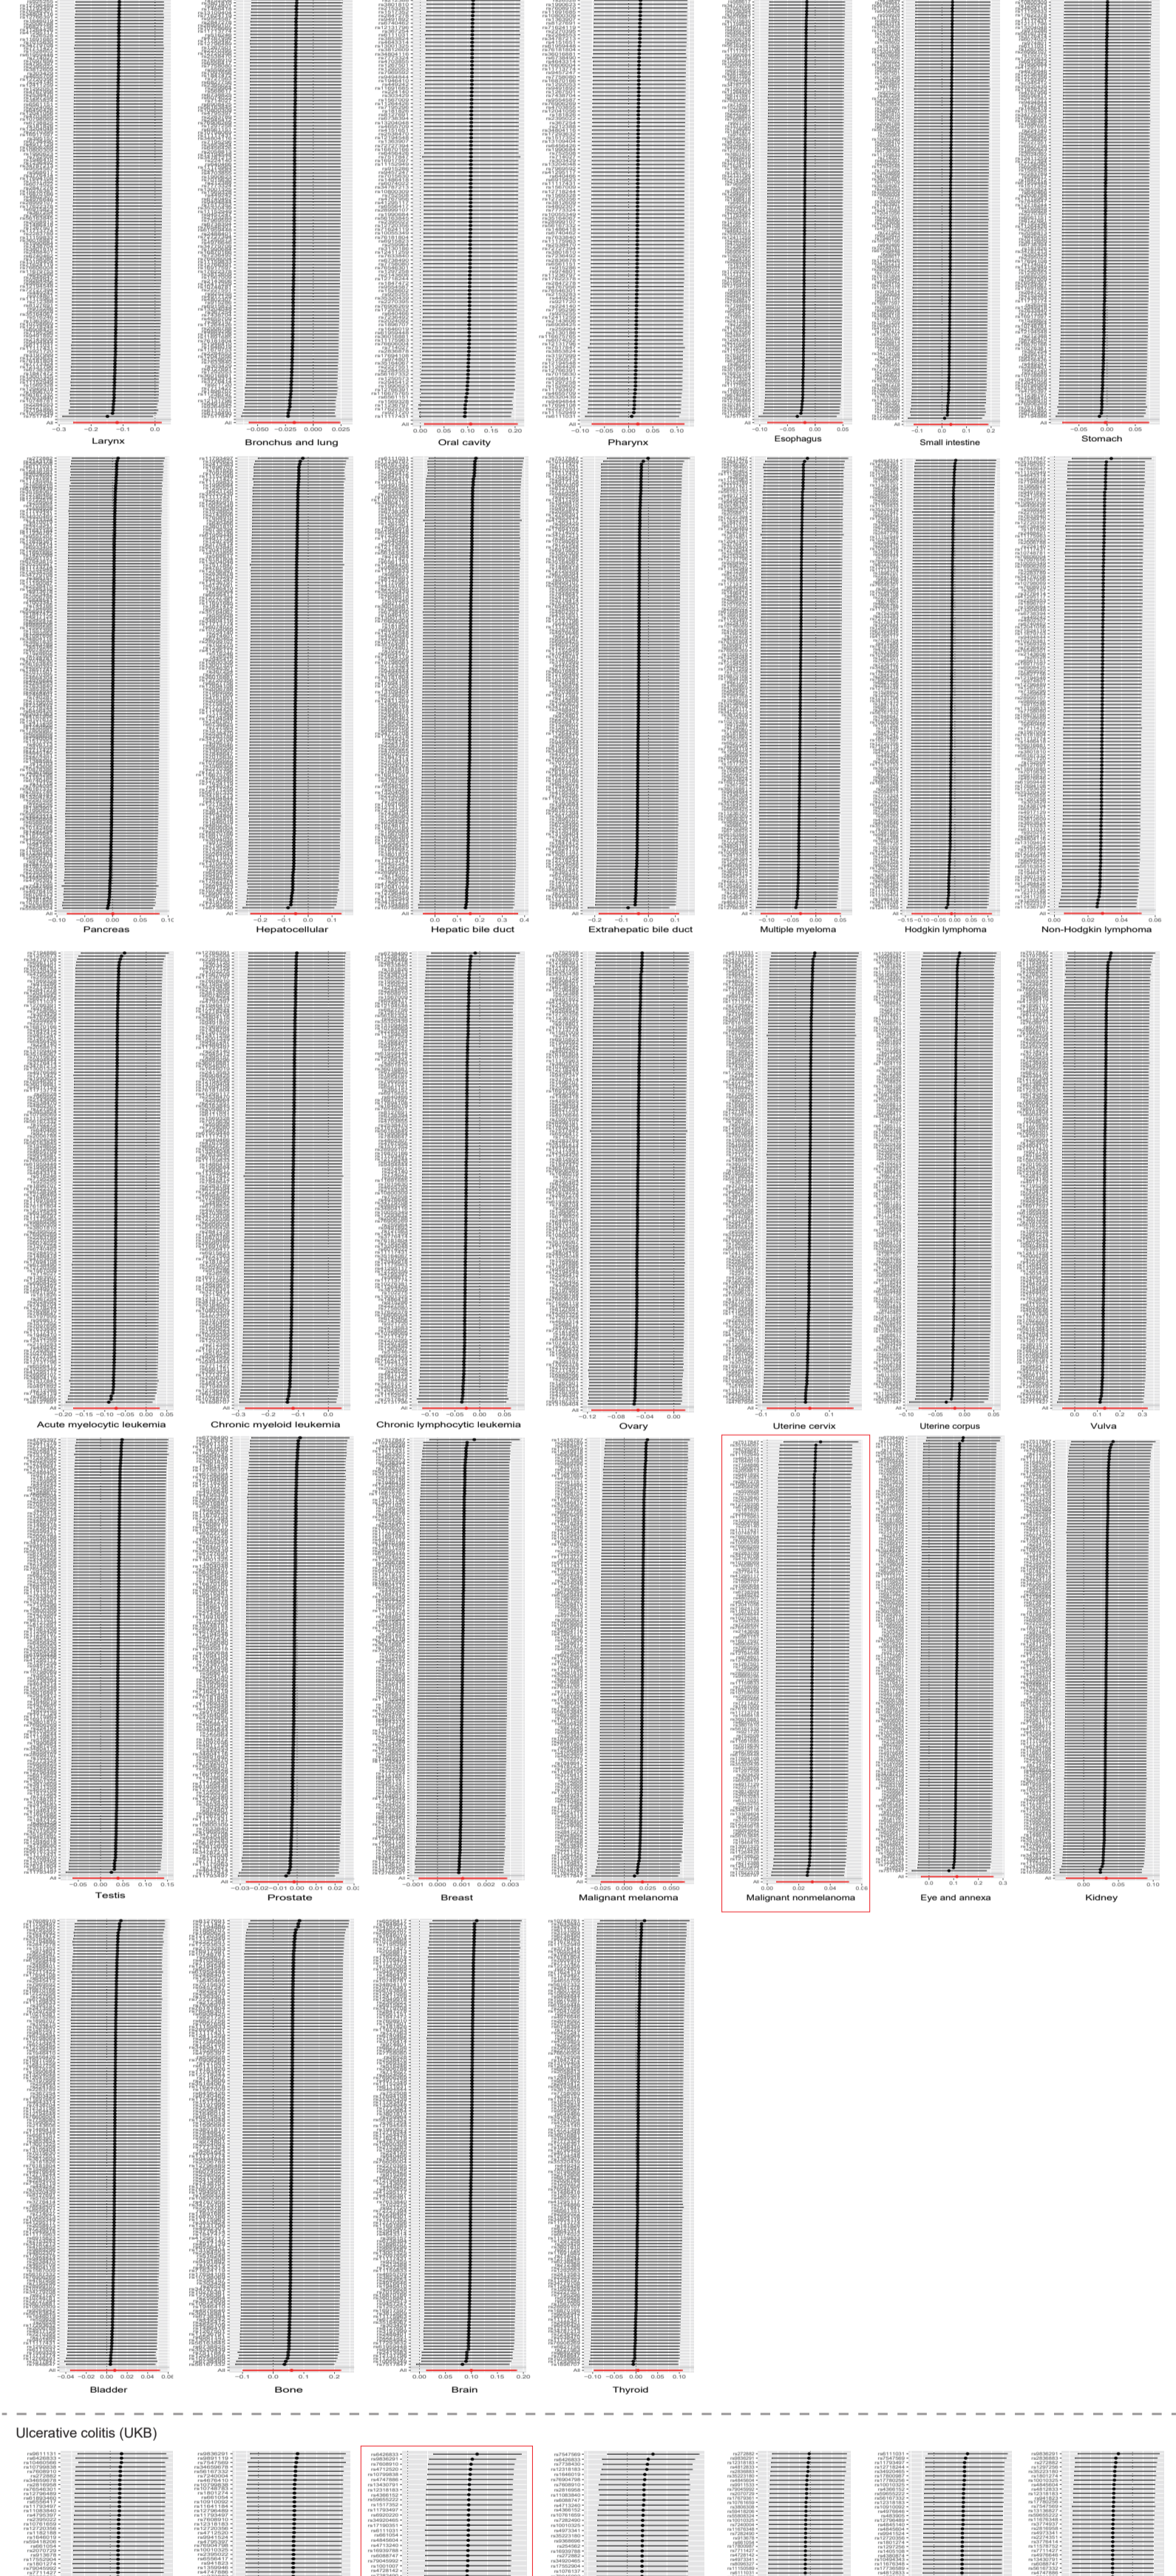

### Ulcerative colitis (UKB)

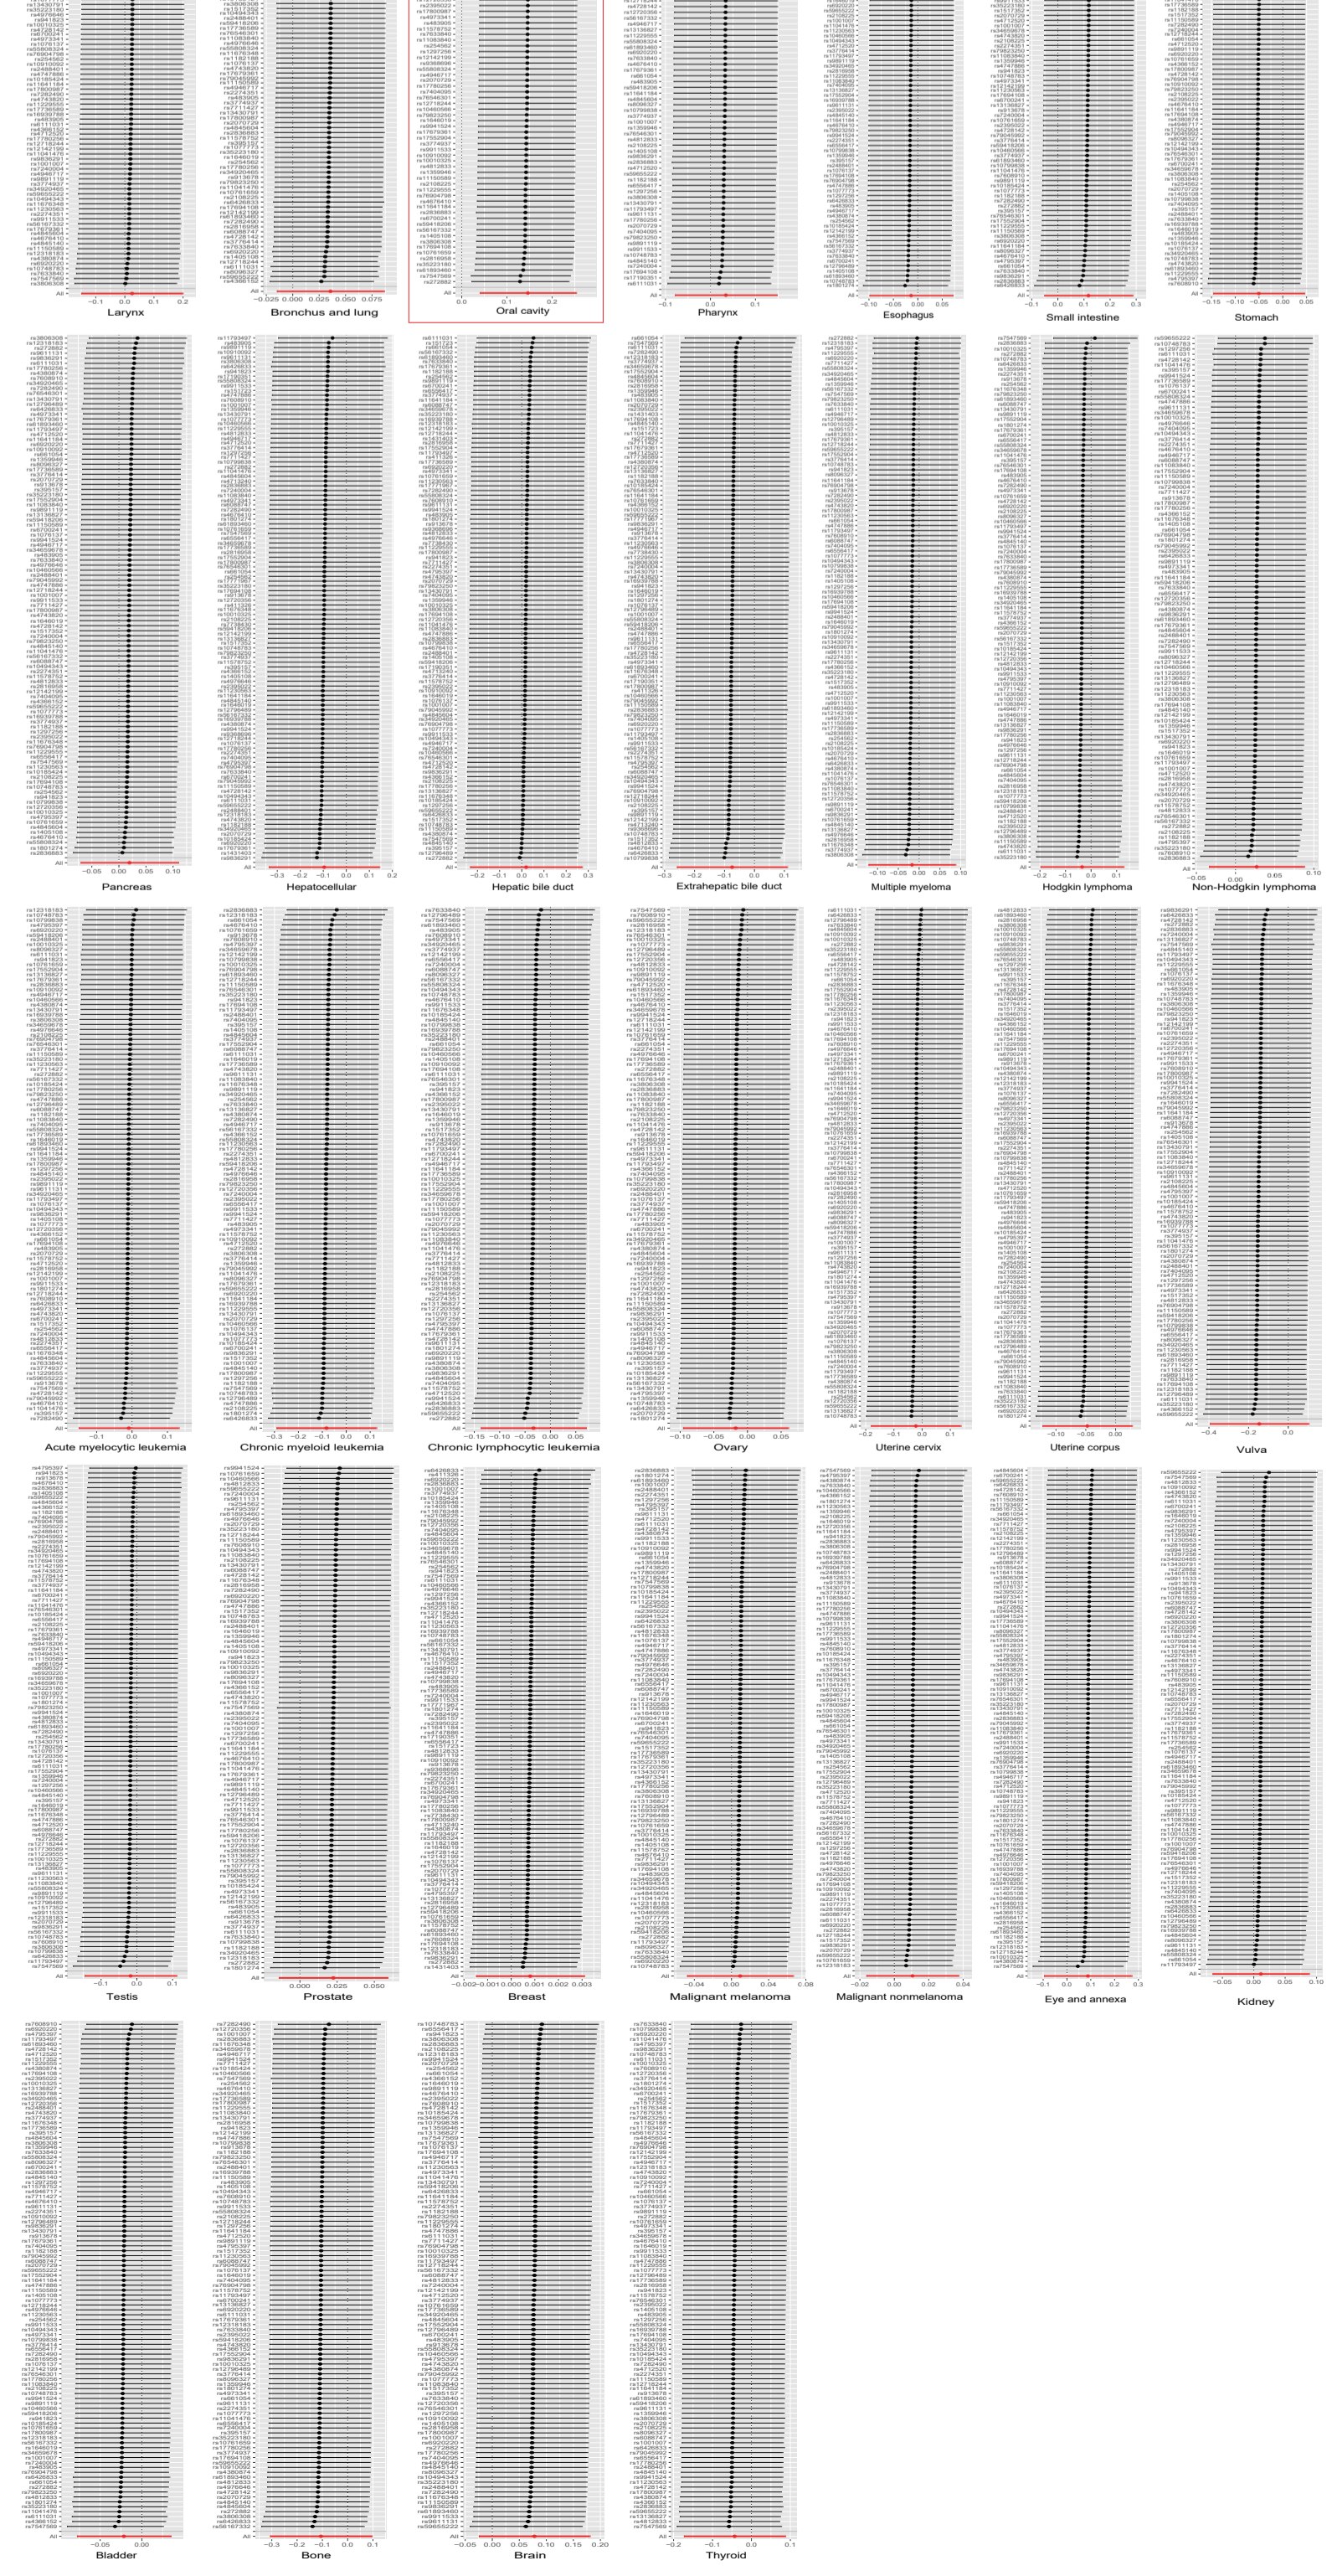

# Additional Figure S2

Inflammatory bowel disease (FinnGen)

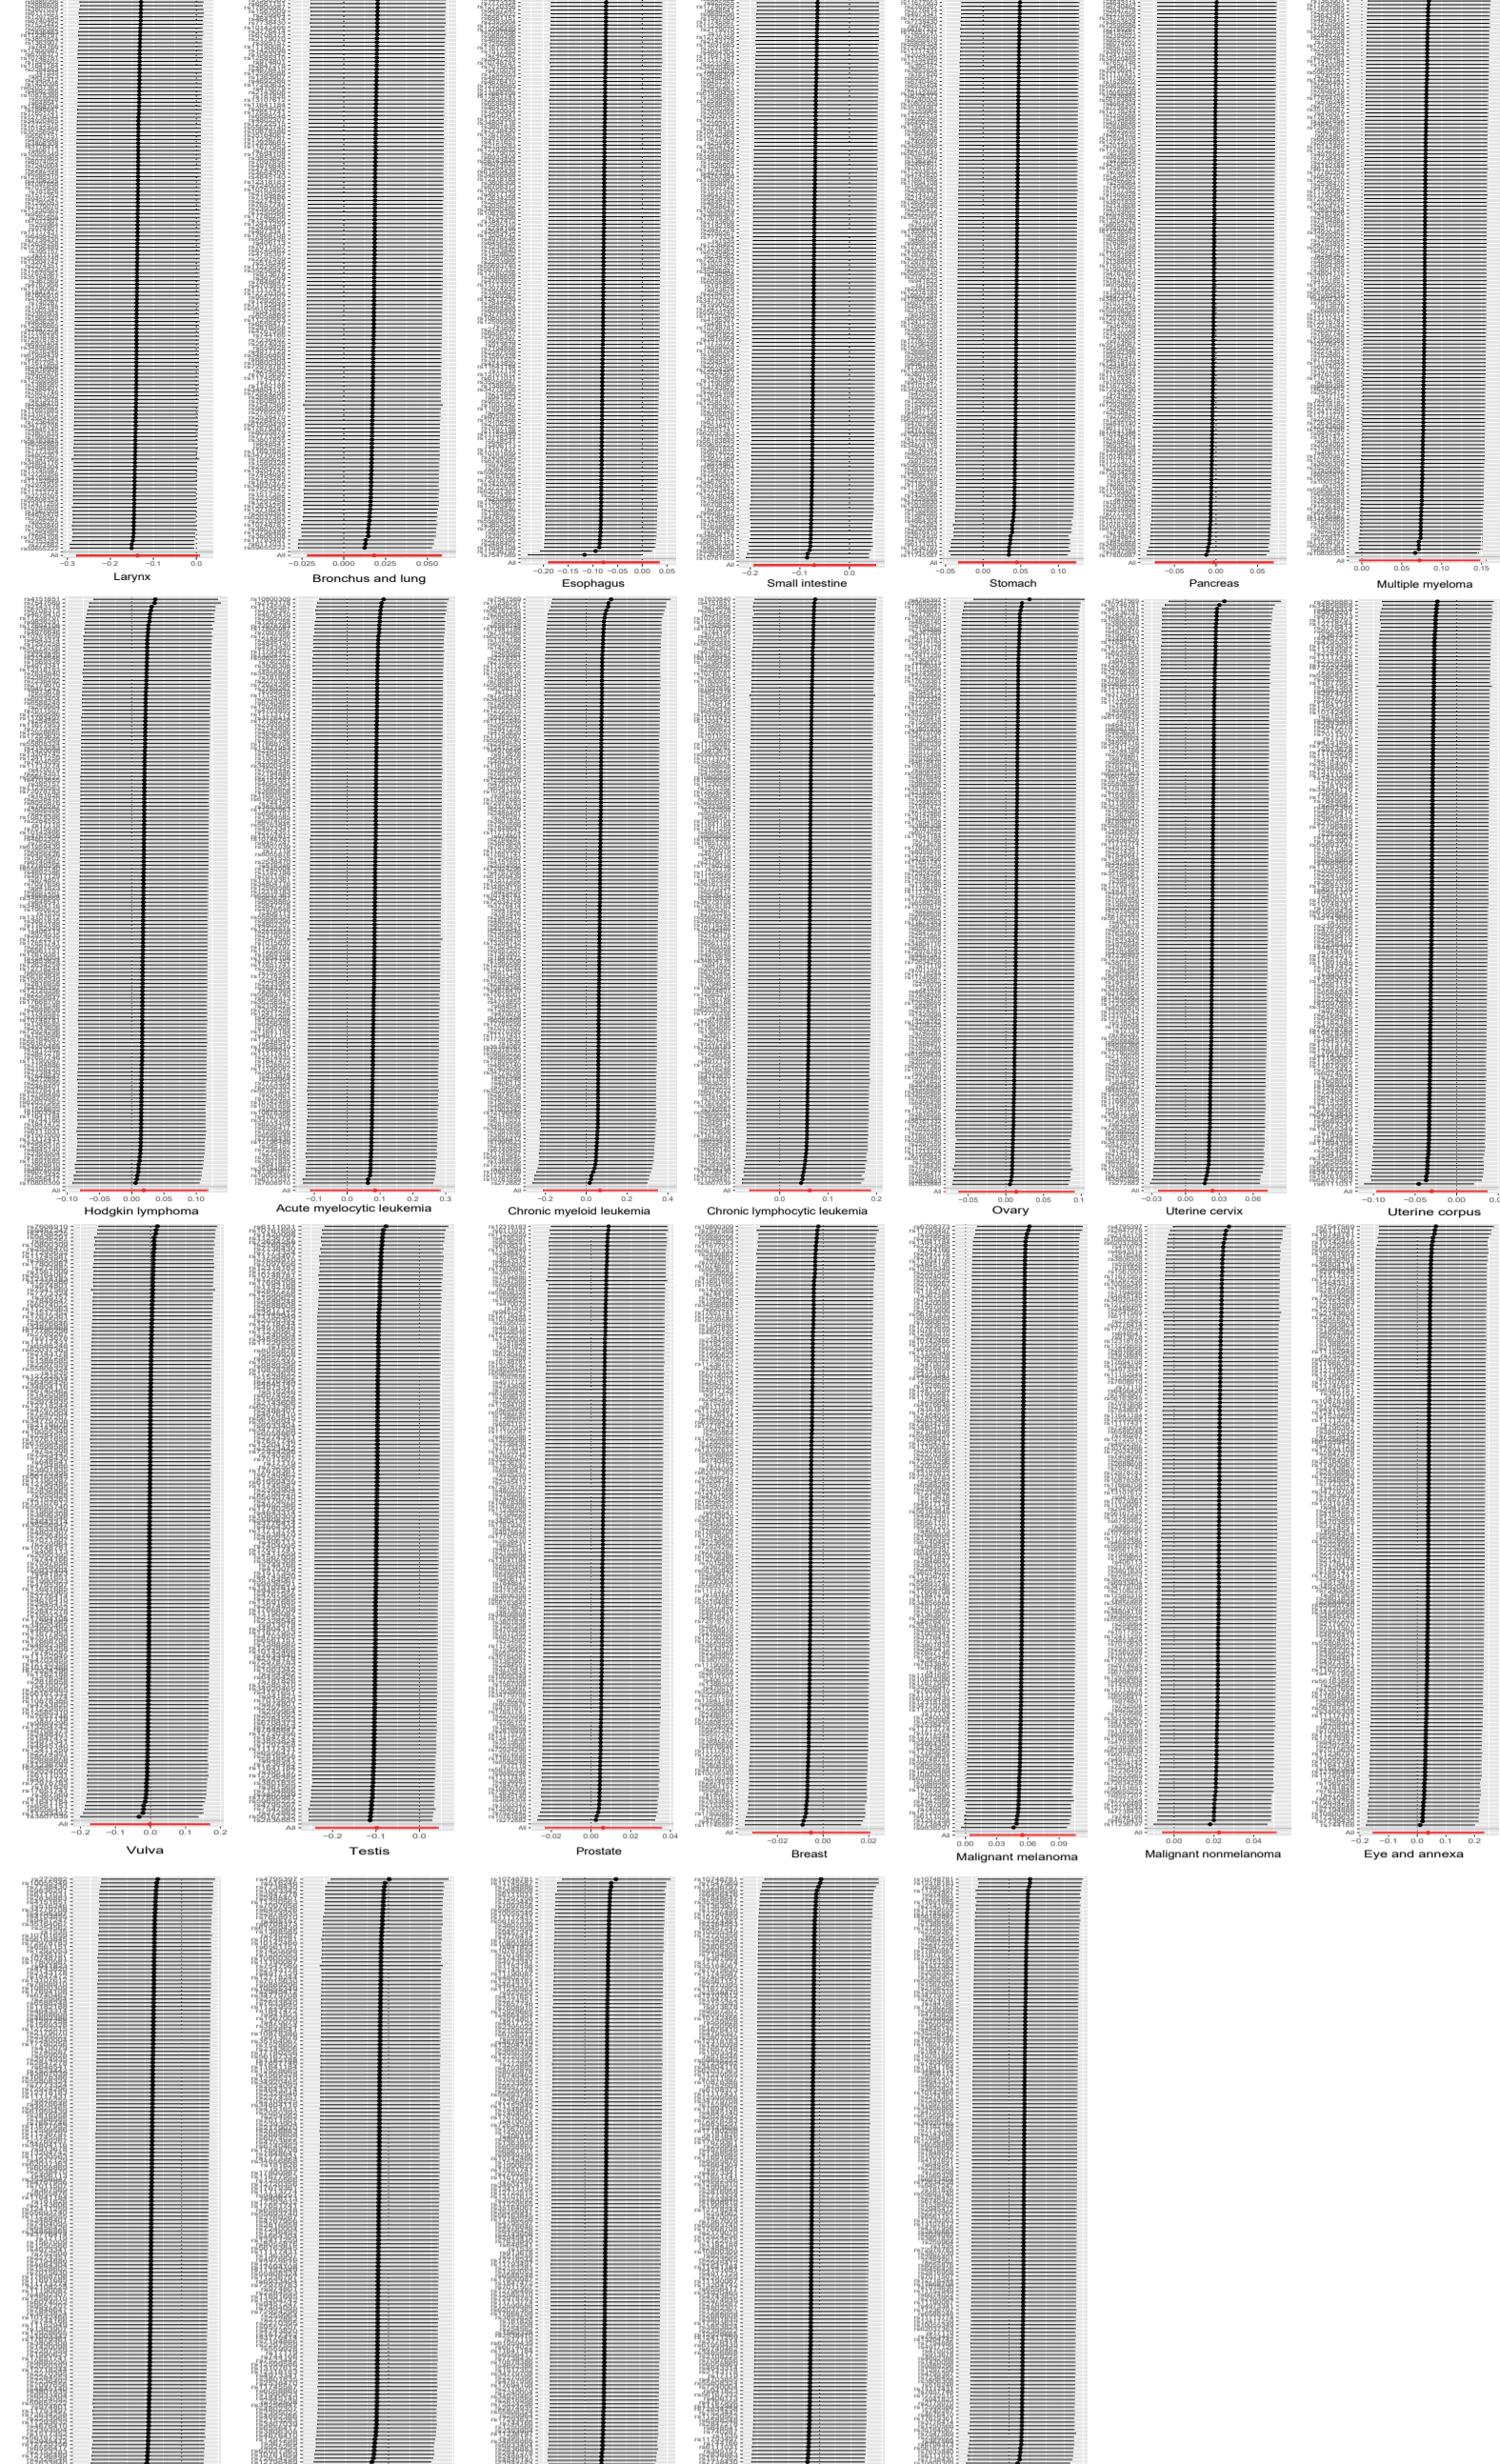

# Crohn's disease (FinnGen)

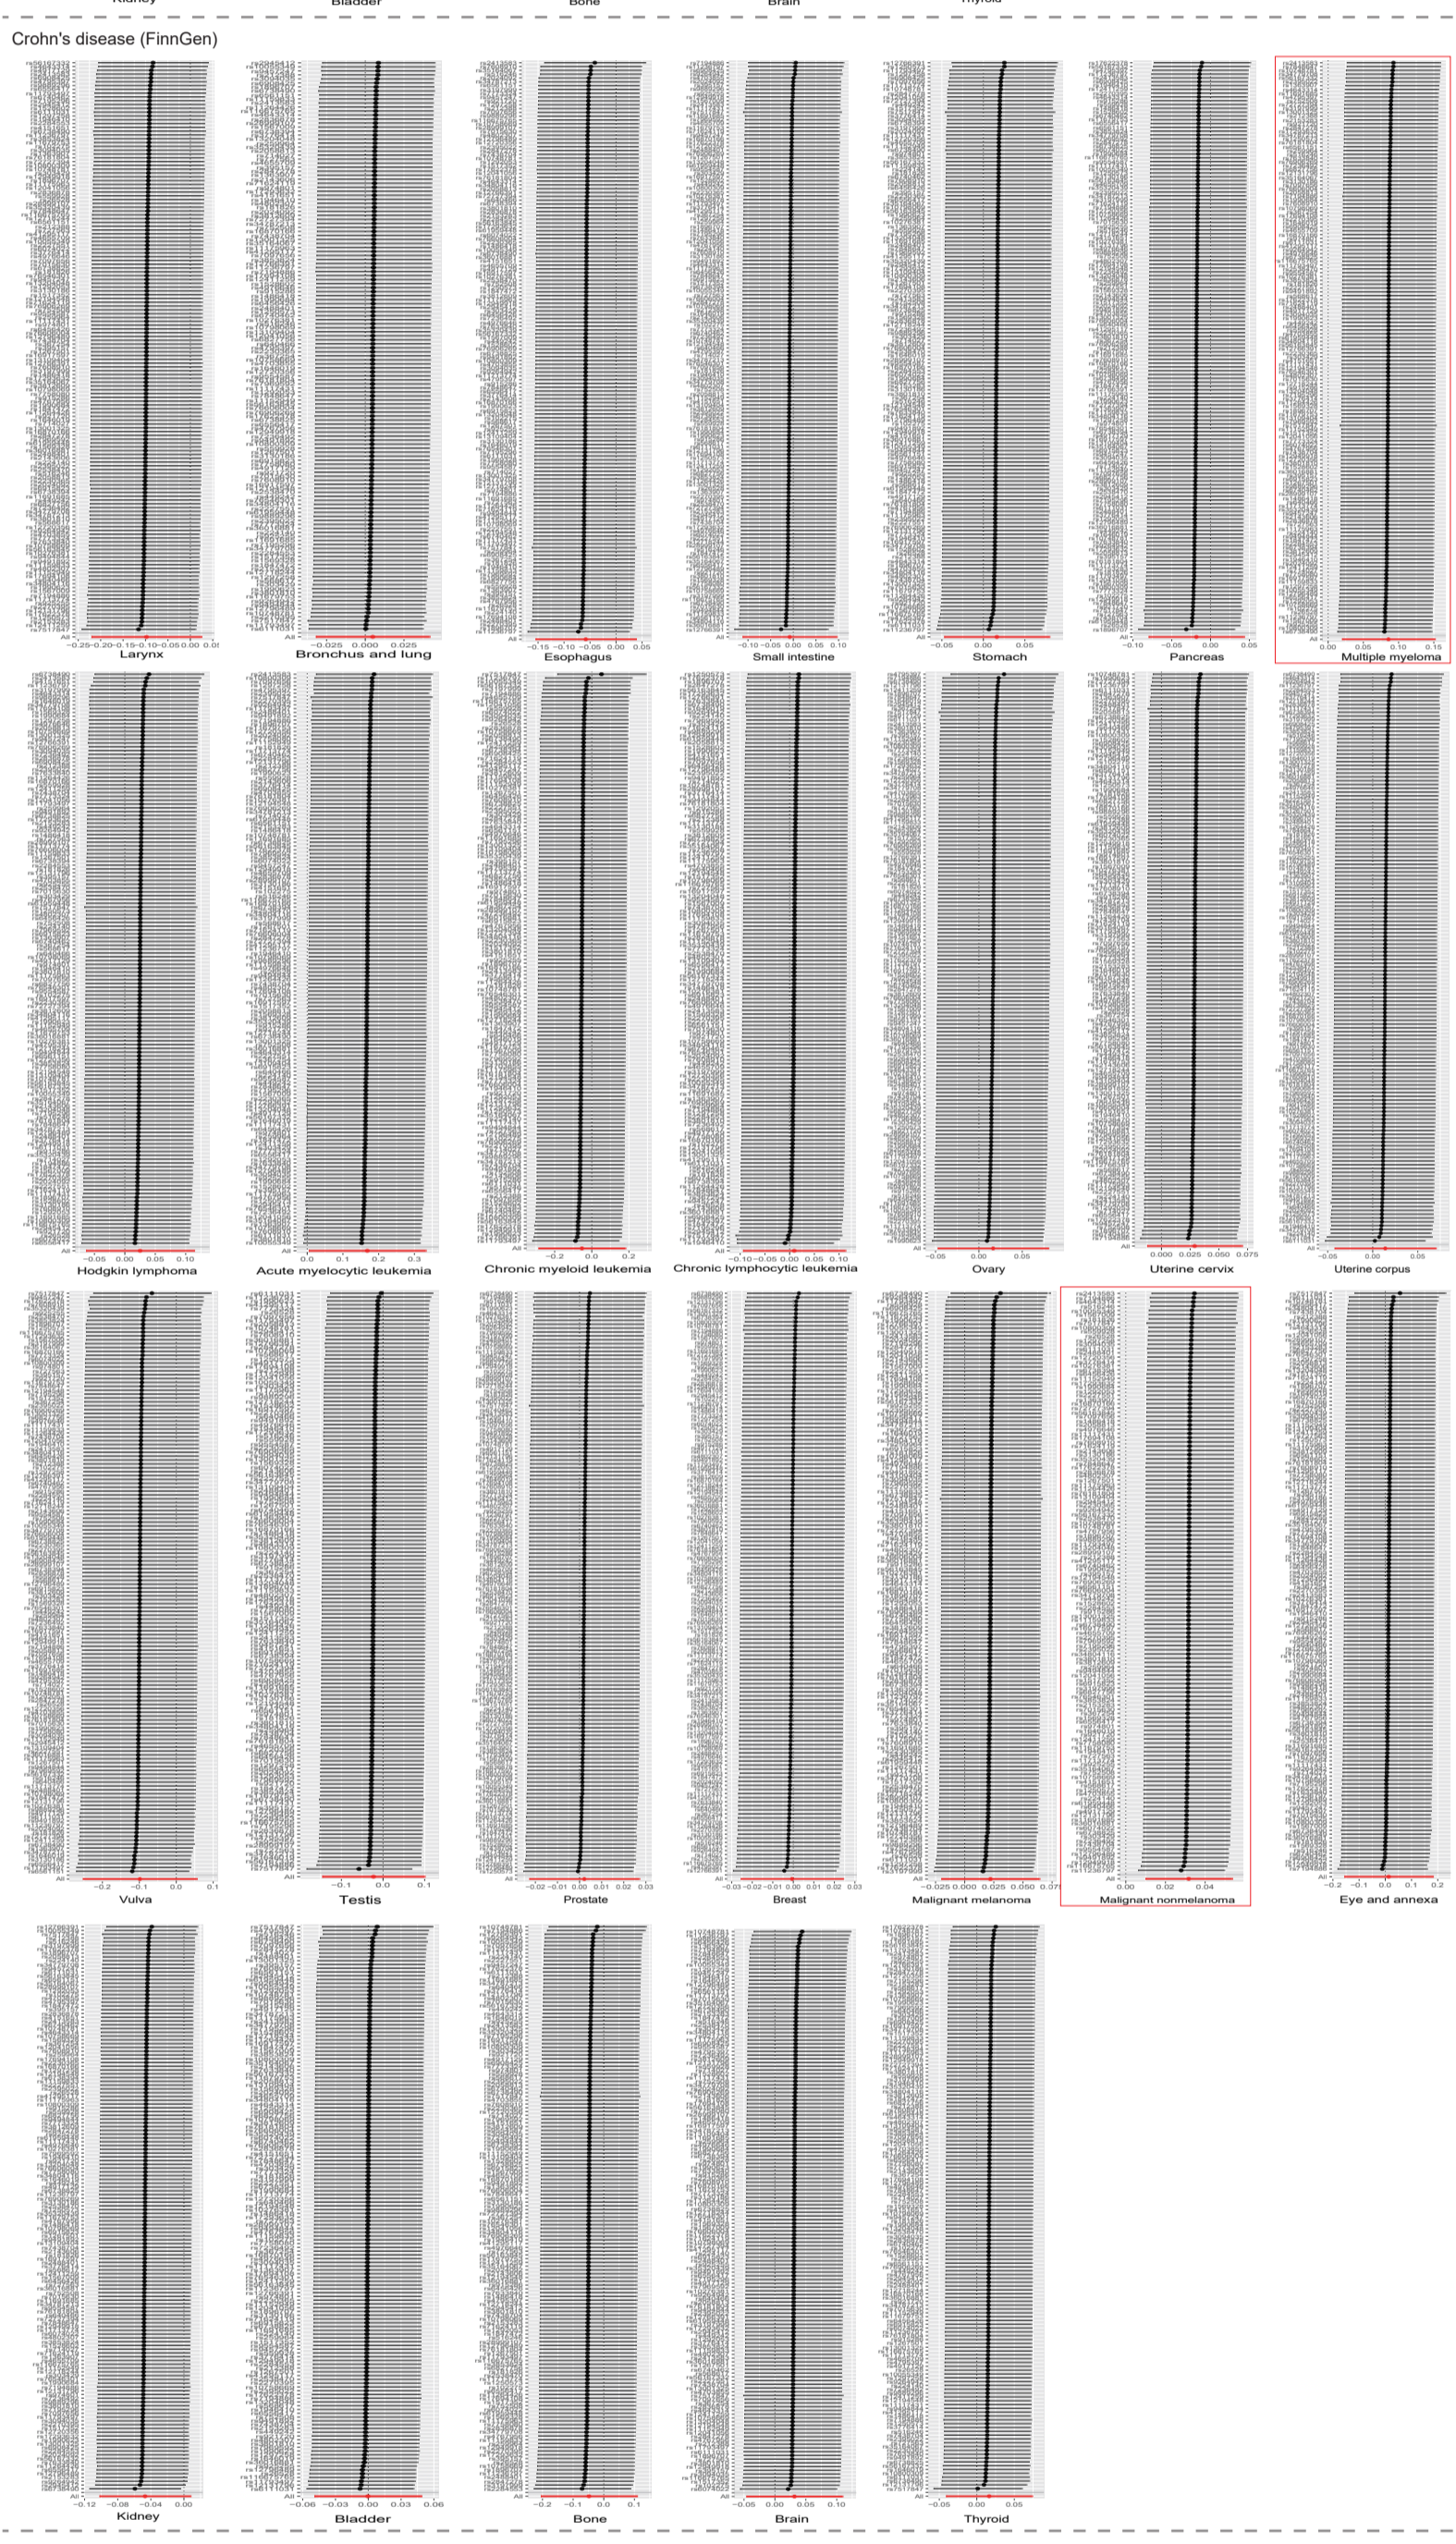

# Ulcerative colitis (FinnGen)

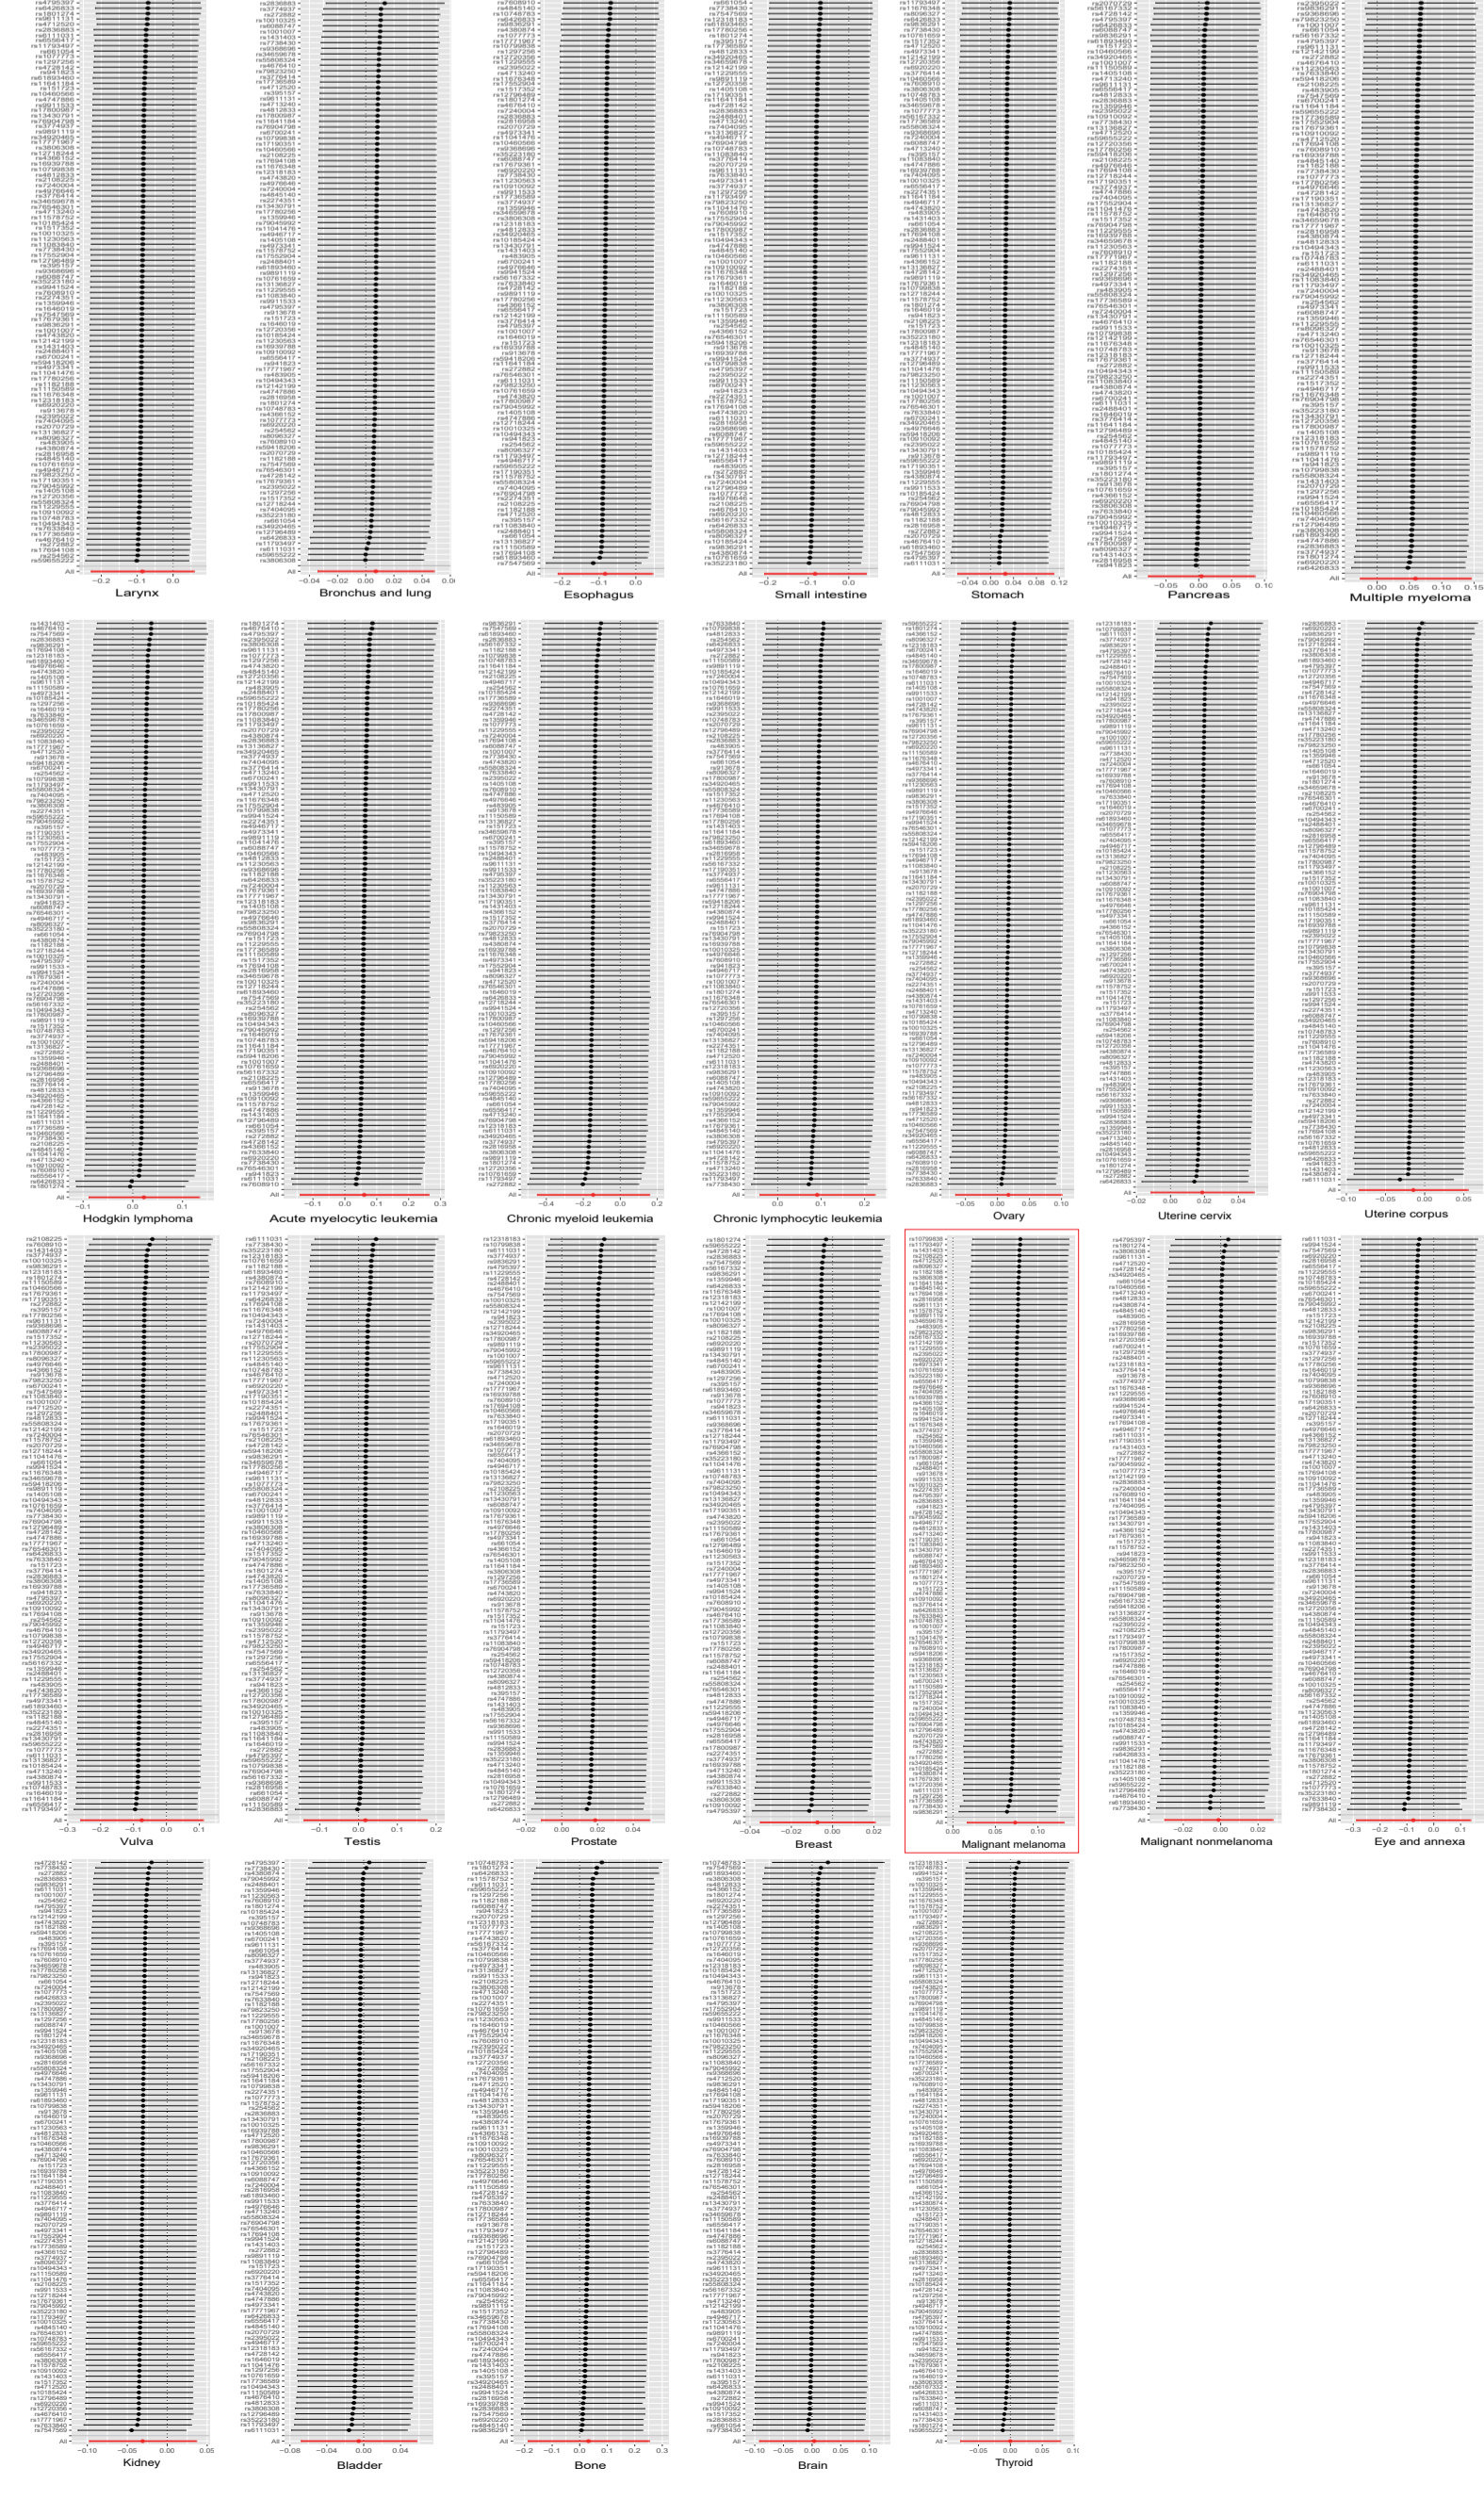

# Additional Figure S3

## Inflammatory bowel disease (Other consortiums)

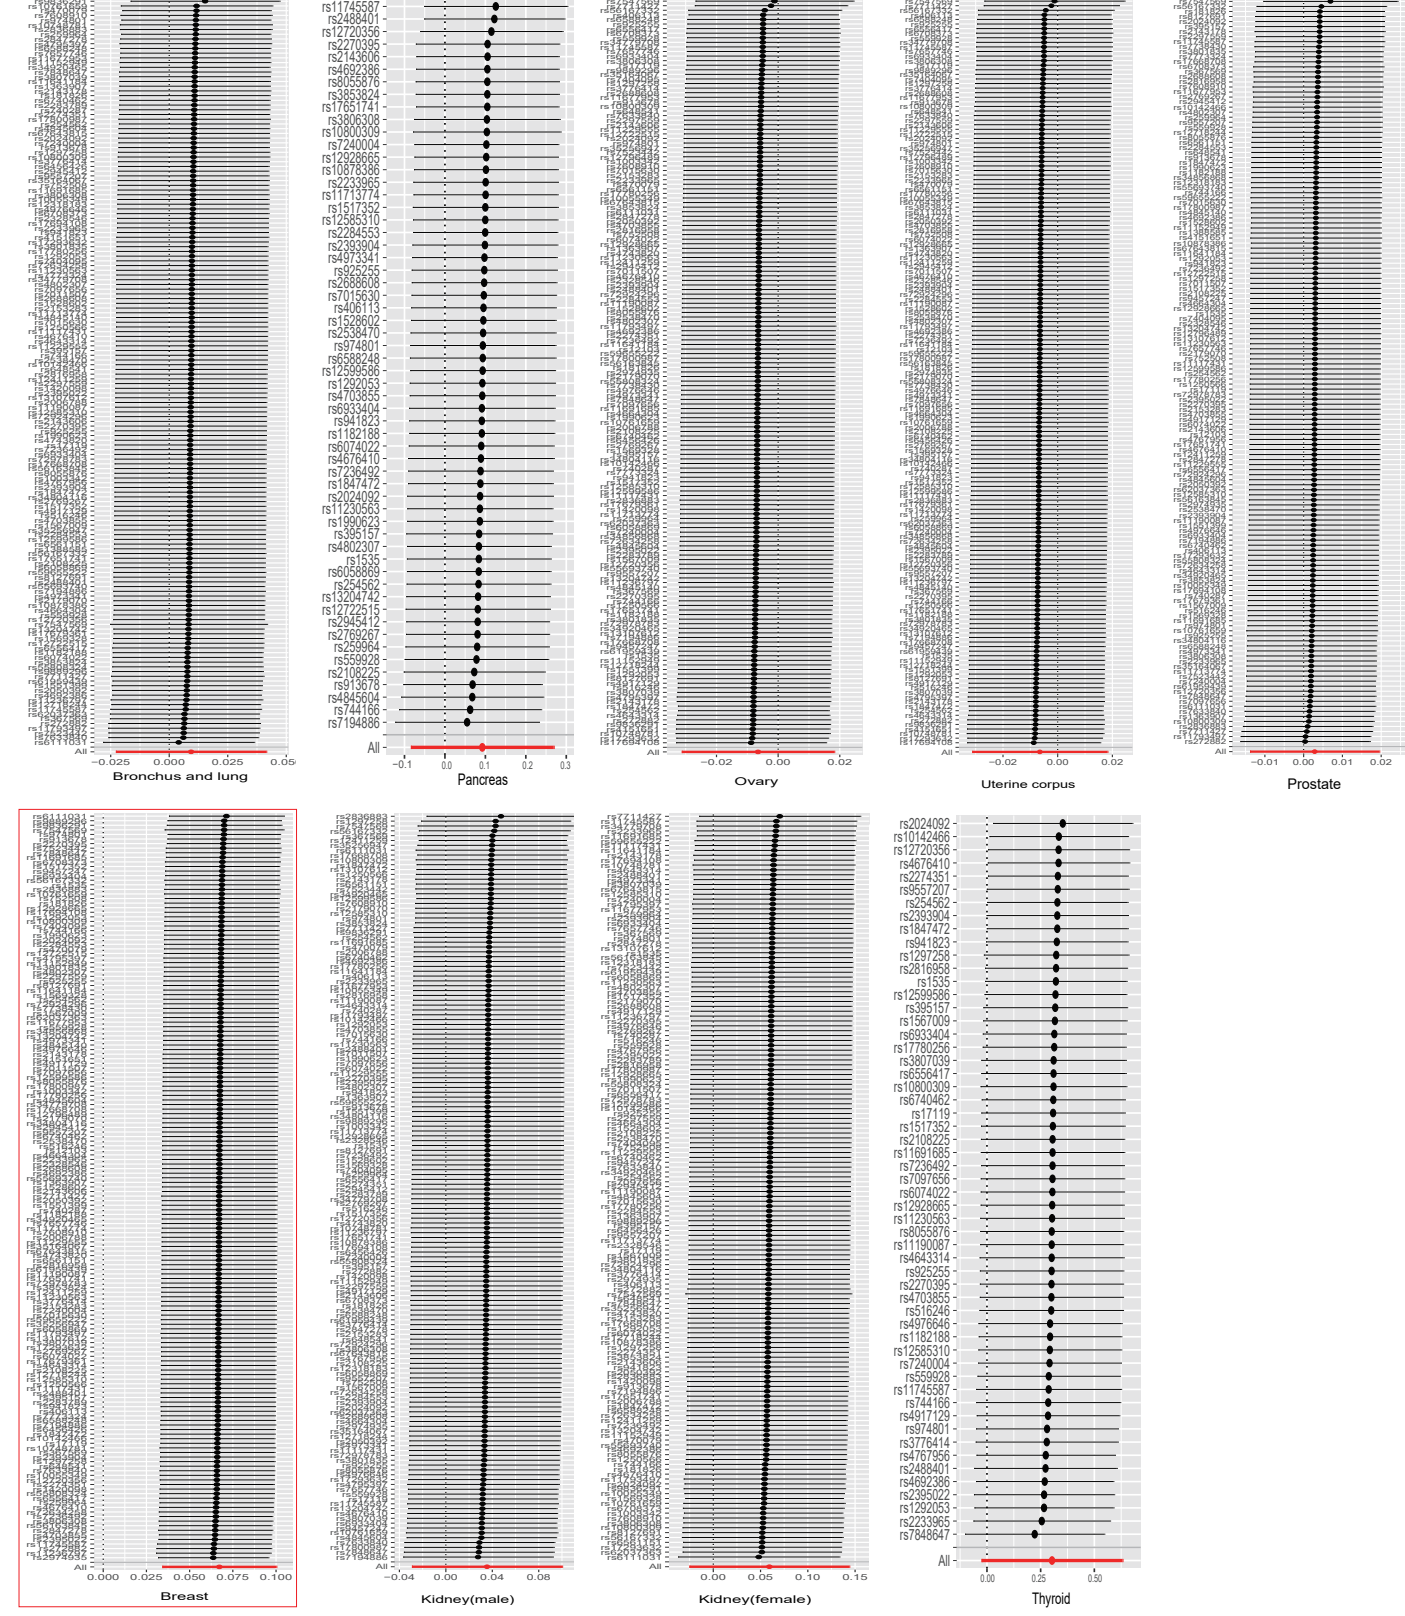

## Crohn's disease (Other consortiums)

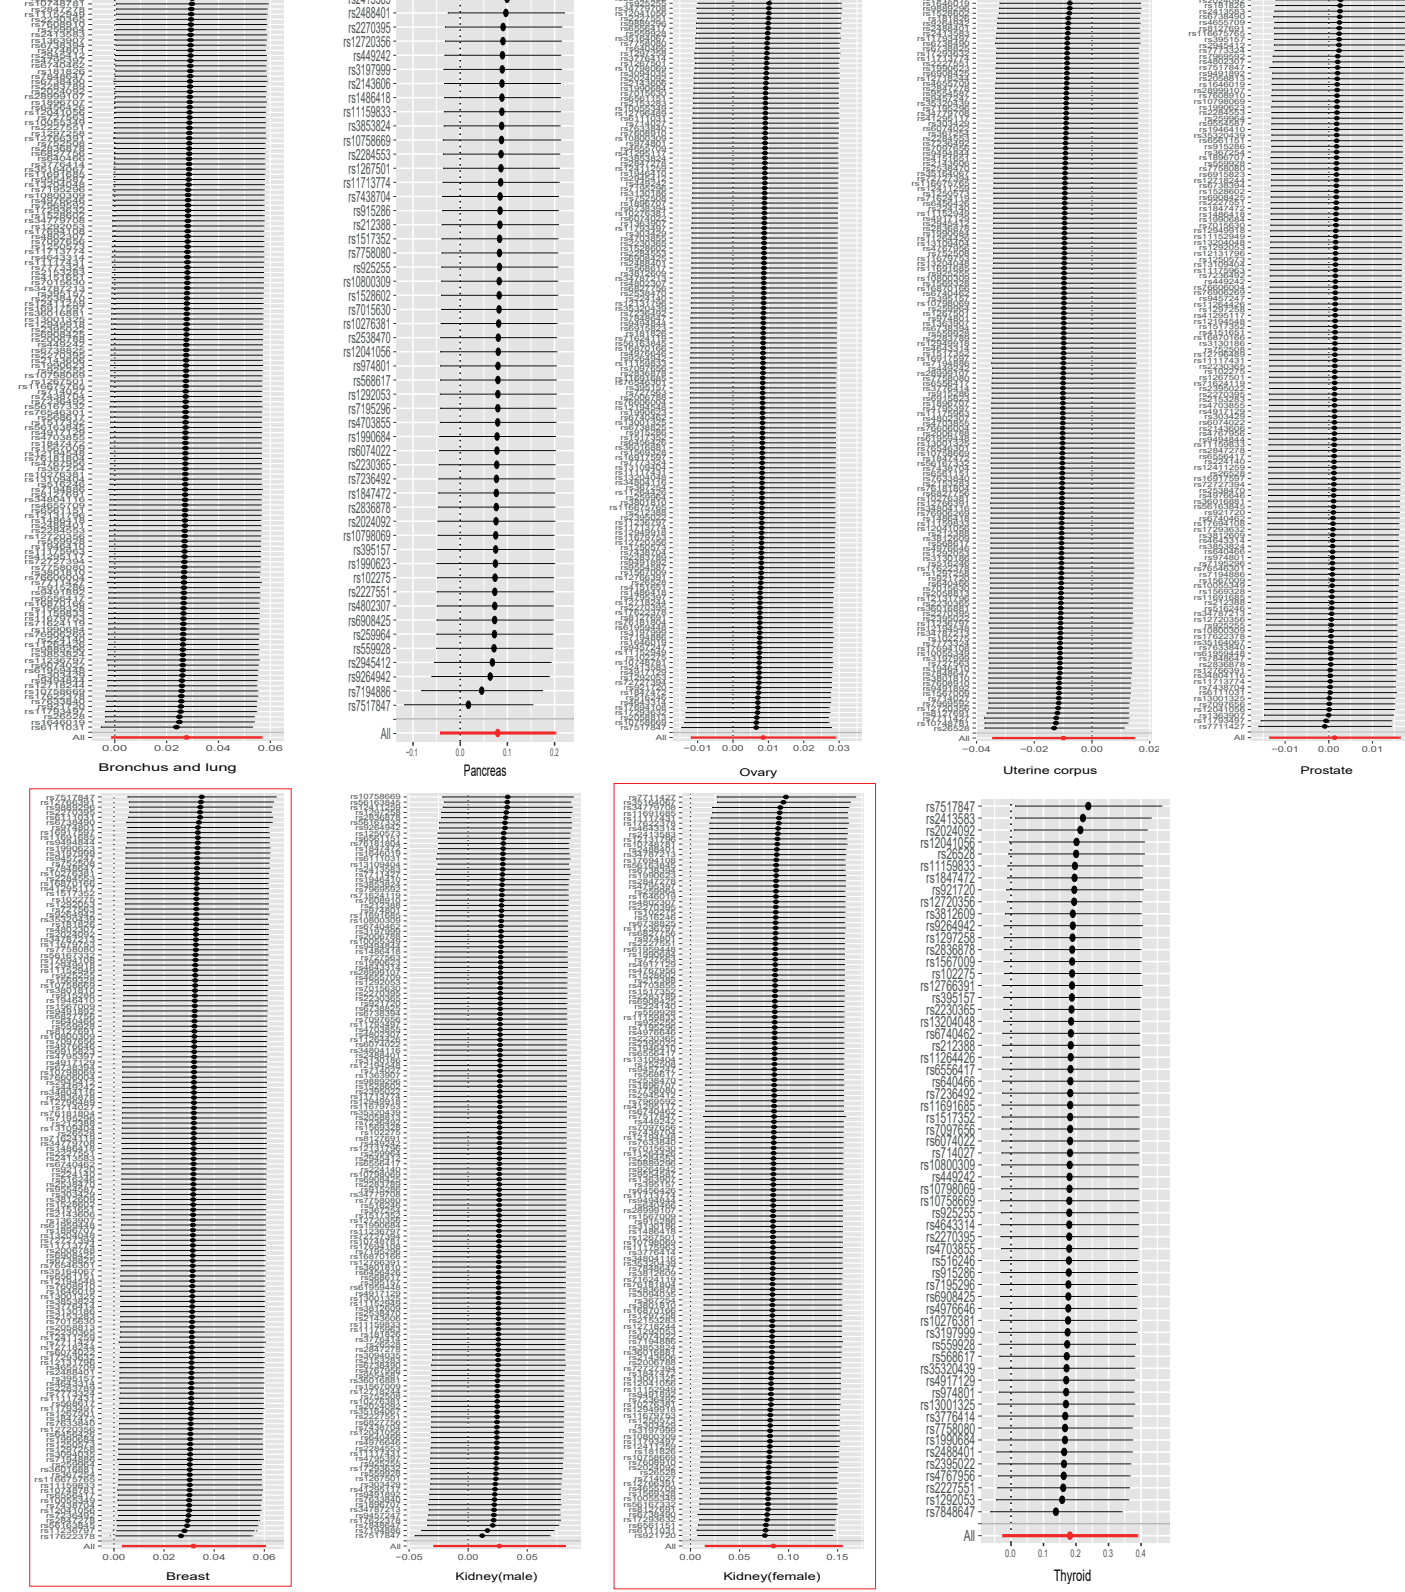

## Ulcerative colitis (Other consortiums)

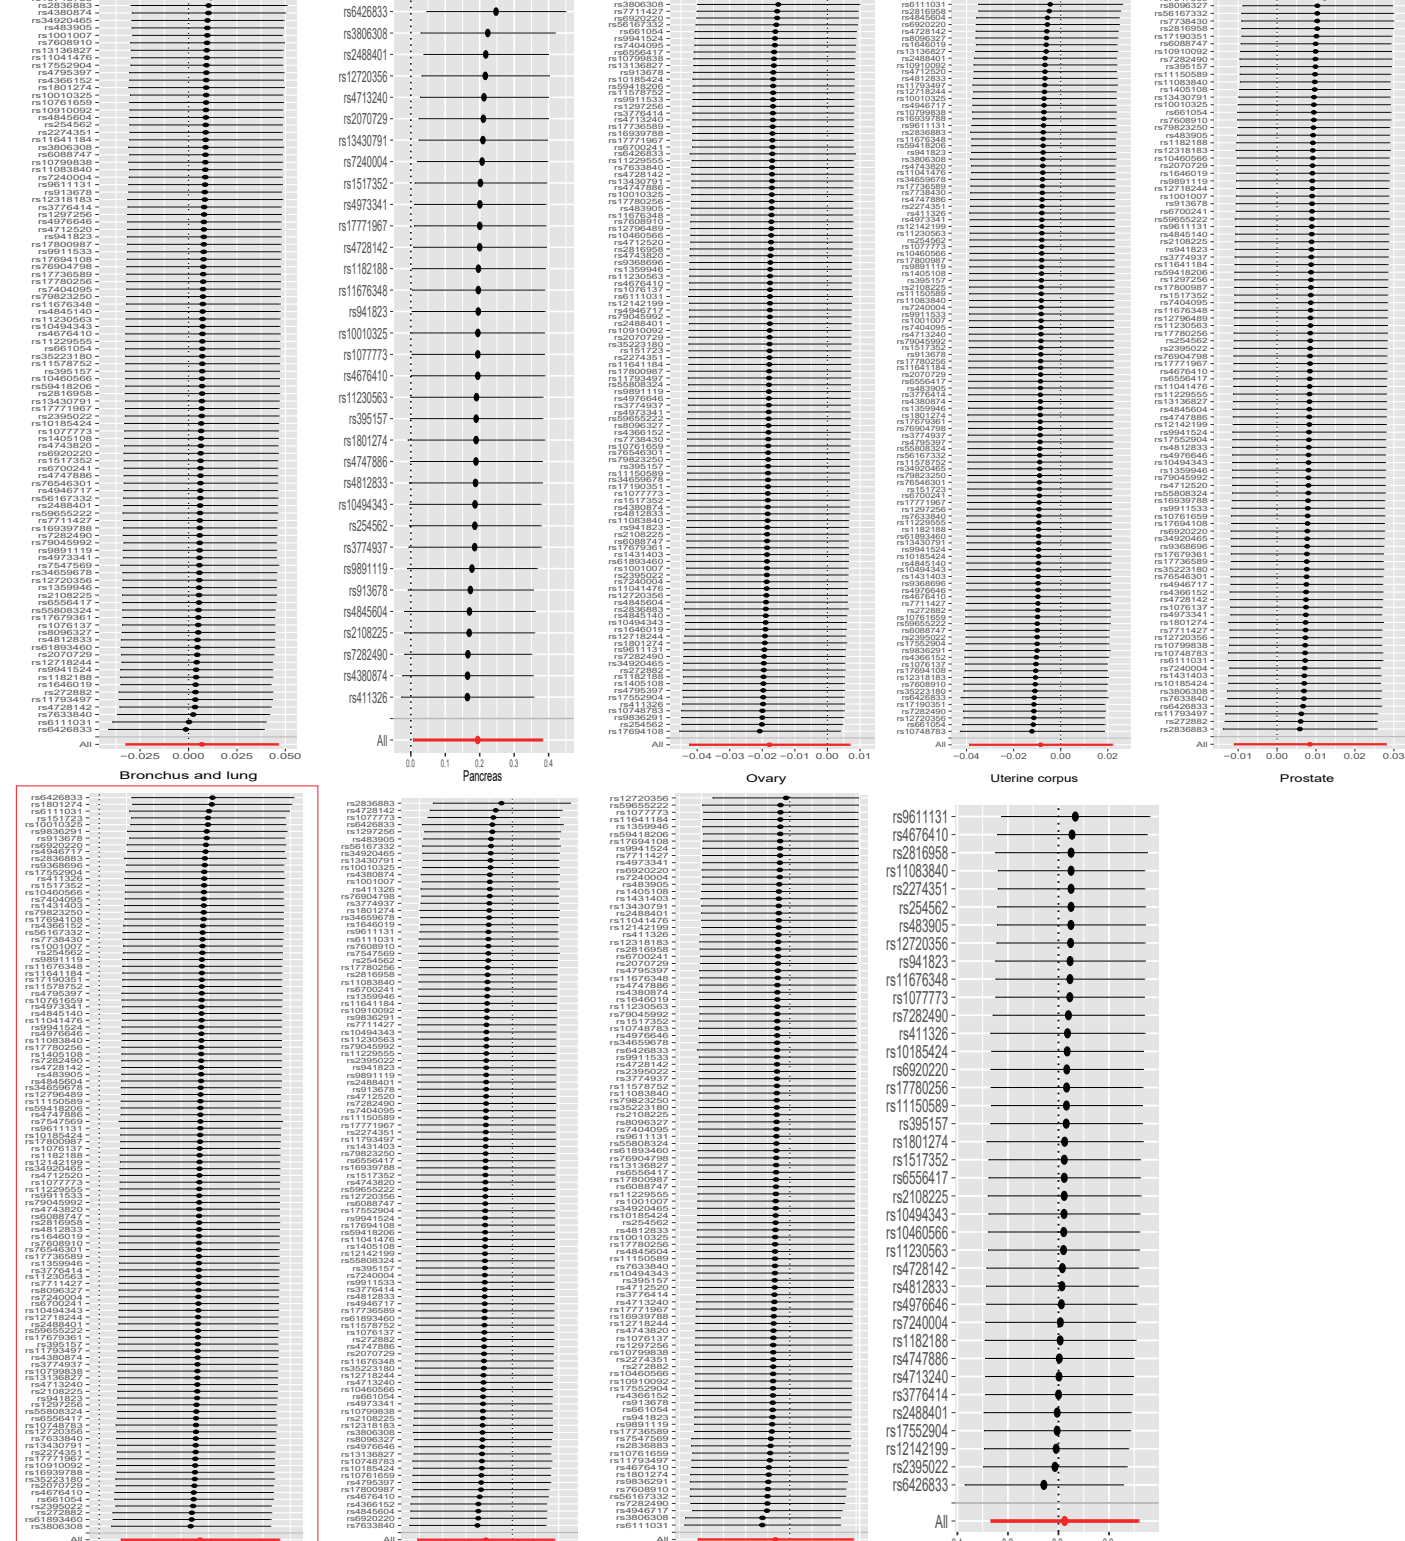

Supplement: MOESM3 [file 26147966]
